# Supplementary material for: Aerobic oxidation of thiols to disulfides by heterogeneous goldcatalysts
Source: Royal Society of Chemistry journal article supplement (doi:10.1039/c1sc00466b), 2011-10-19

## SUPPLEMENTARY MATERIAL

Table 1S. Characterization data of metal catalysts<sup>a</sup>.

| Entry          | Catalyst            | d(nm)     | %metal wt<br>(nominal) | %metal wt<br>(ICP) |
|----------------|---------------------|-----------|------------------------|--------------------|
| 1              | Au/CeO <sub>2</sub> | 2.0+-0.43 | 0.8                    | 1.01               |
| 2 <sup>b</sup> | Au/CeO <sub>2</sub> | 2.1+-0.36 | 0.8                    | 1.1                |
| 3              | Fe/CeO <sub>2</sub> | 3.6+-0.36 | 1.0                    | 0.75               |
| 4              | Cu/CeO <sub>2</sub> | 2.6+-0.36 | 1.0                    | 0.67               |
| 5              | Ni/CeO <sub>2</sub> | 2.9+-0.36 | 1.0                    | 0.95               |
| 6              | Pd/CeO <sub>2</sub> | 3.5+-0.36 | 1.0                    | 0.70               |

- a) The catalysts were prepared following the impregnation method (see experimental section);  
b) the catalyst was prepared following the deposition-precipitation method (see experimental section).

Table 2S. Characterization data of Au-CeO<sub>2</sub> catalysts<sup>a</sup>.

| Entry          | Catalyst            | d(nm)     | %Au(nominal) | %Au(ICP) |
|----------------|---------------------|-----------|--------------|----------|
| 1              | Au/CeO <sub>2</sub> | 1.99±0.43 | 0.8          | 1.01     |
| 2 <sup>b</sup> | Au/CeO <sub>2</sub> | 2.30±0.95 | 1.03         | 1.03     |
| 3 <sup>c</sup> | Au/CeO <sub>2</sub> | 2.81±1.12 | 1.03         | 1.03     |
| 4              | Au/CeO <sub>2</sub> | 2.03±0.51 | 1.5          | 1.59     |
| 5              | Au/CeO <sub>2</sub> | 2.62±0.40 | 3.0          | 3.46     |
| 6              | Au/CeO <sub>2</sub> | 3.01±0.43 | 5.0          | 4.62     |
| 7              | Au/CeO <sub>2</sub> | 3.31±0.58 | 10.0         | 10.98    |

a) Prepared by impregnation method (see experimental section); b) reduced with H<sub>2</sub> at 100°C for 3h; c) reduced with H<sub>2</sub> at 300°C for 3h.

**Figure 1S** Plots showing the evolution of conversion (%) and yield of product **2** with time in the oxidation reaction of thiol **1** to disulfide **2** with O<sub>2</sub> (PO<sub>2</sub> = 5bar) at room temperature in the presence of Au-CeO<sub>2</sub> (0.8% Au wt) prepared by impregnation method (Au-CeO<sub>2</sub> IMP) and by deposition-precipitation method (Au-CeO<sub>2</sub> DP).

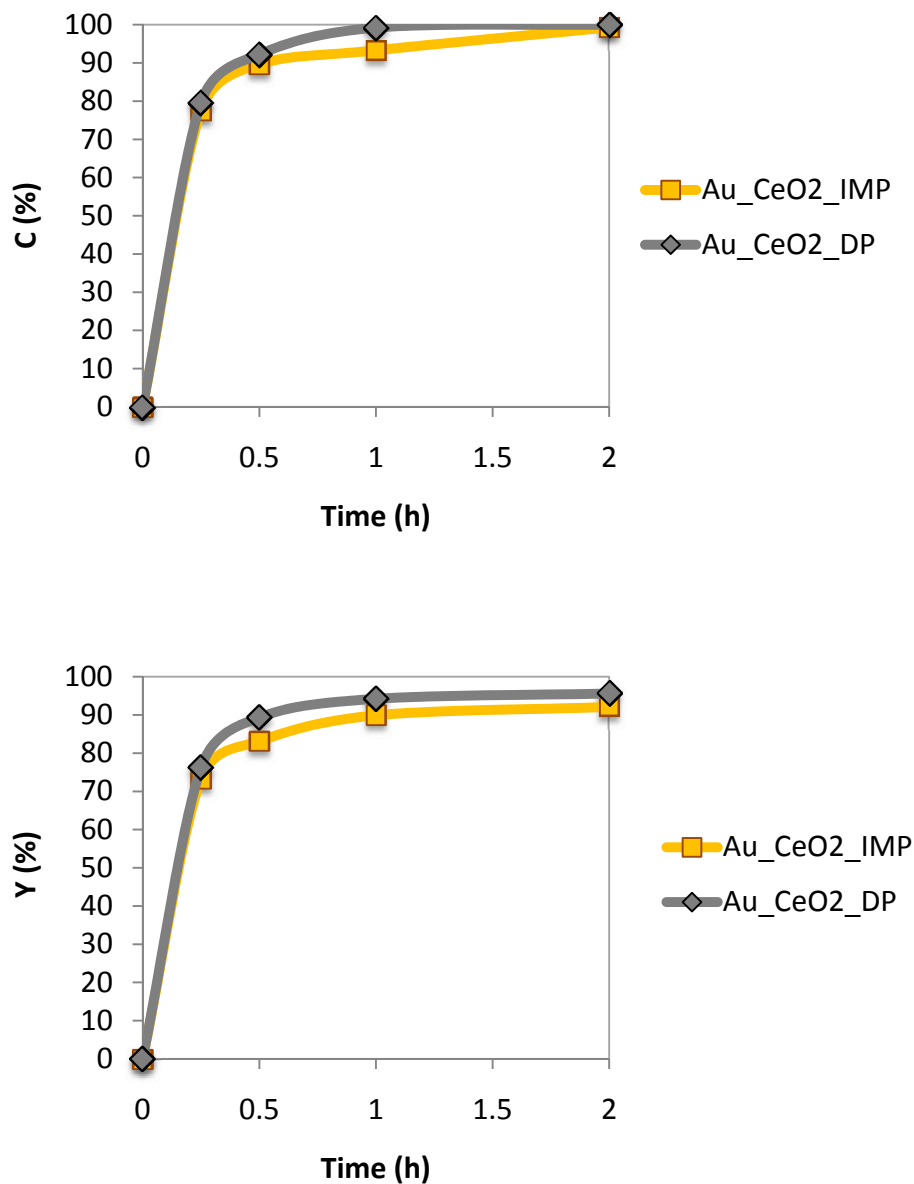

Supplement: c1sc00466b.pdf [file c1sc00466b.pdf]
